# Supplementary material for: Study of ‘Cona degli Ordini’ by Colantonio with IR and XRF Analyses
Source: MDPI journal article supplement (doi:10.3390/heritage6020095), 2023-02-06
Supplement: s1 [file s1]

**Table S1.** Counts of the main fluorescence characteristic line detected in the measurement points of *Saint Francis delivering the Rule*.

| Point | Hg L $\alpha$ | K K $\alpha$ | Cu K $\alpha$ | Pb L $\alpha$ | Ca K $\alpha$ | Sr K $\alpha$ | Fe K $\alpha$ | Sn K $\alpha$ | Au L $\alpha$ | Pb M $\alpha$ |
|-------|---------------|--------------|---------------|---------------|---------------|---------------|---------------|---------------|---------------|---------------|
| 1     | 0             | 1579         | 97740         | 97225         | 2510          | 5346          | 9676          | 2178          | 0             | 2388          |
| 2     | 2814          | 1432         | 1564          | 198386        | 1372          | 2115          | 7828          | 4771          | 0             | 3922          |
| 3     | 0             | 1492         | 619           | 238807        | 854           | 1437          | 810           | 10558         | 0             | 5365          |
| 4     | 899           | 1878         | 799           | 154604        | 2690          | 5687          | 2389          | 0             | 0             | 4440          |
| 5     | 9012          | 649          | 159           | 209775        | 1191          | 3202          | 2122          | 517           | 0             | 6610          |
| 6     | 0             | 5403         | 834           | 47496         | 14201         | 8474          | 10255         | 0             | 0             | 3210          |
| 7     | 7581          | 4105         | 39969         | 117406        | 1235          | 5405          | 2892          | 2047          | 0             | 4137          |
| 8     | 26589         | 6677         | 613           | 62535         | 2973          | 8206          | 2931          | 0             | 5125          | 2242          |
| 9     | 21592         | 6511         | 783           | 60528         | 6170          | 7673          | 4424          | 0             | 0             | 2116          |
| 10    | 0             | 915          | 230           | 1077          | 21693         | 6934          | 10796         | 0             | 19588         | 321           |
| 11    | 6451          | 1194         | 106           | 102051        | 4673          | 8391          | 15496         | 0             | 0             | 5058          |
| 12    | 7193          | 411          | 113           | 150194        | 1916          | 4090          | 6295          | 0             | 0             | 5909          |
| 13    | 0             | 3864         | 141           | 4146          | 29413         | 8468          | 26549         | 0             | 1845          | 734           |
| 14    | 0             | 591          | 74            | 373           | 33635         | 7554          | 9837          | 0             | 18509         | 235           |
| 15    | 562           | 656          | 352           | 81867         | 11084         | 7234          | 30599         | 0             | 0             | 2954          |
| 16    | 0             | 915          | 1617          | 41862         | 10211         | 5389          | 14334         | 0             | 39903         | 928           |
| 17    | 0             | 3470         | 1875          | 42226         | 6347          | 8136          | 14222         | 0             | 41180         | 818           |
| 18    | 0             | 1401         | 1818          | 3063          | 10918         | 5311          | 41334         | 0             | 46647         | 380           |
| 19    | 15060         | 344          | 315           | 185728        | 2091          | 2098          | 7325          | 1399          | 0             | 3913          |
| 20    | 0             | 1360         | 644           | 7882          | 11161         | 11361         | 34004         | 0             | 28689         | 447           |
| 21    | 0             | 3984         | 110637        | 12775         | 7811          | 6572          | 21104         | 0             | 31092         | 291           |
| 22    | 0             | 2166         | 3596          | 148713        | 5804          | 2106          | 35660         | 3879          | 0             | 1497          |
| 23    | 0             | 986          | 428496        | 84258         | 4146          | 602           | 20260         | 533           | 0             | 963           |
| 24    | 23205         | 1118         | 1854          | 161210        | 1656          | 2314          | 10845         | 561           | 0             | 3033          |
| 25    | 1773          | 2447         | 22208         | 75501         | 2279          | 6006          | 15551         | 812           | 0             | 1909          |
| 26    | 10885         | 244          | 79            | 195257        | 1631          | 2808          | 1200          | 612           | 0             | 6564          |
| 27    | 7546          | 470          | 186           | 129705        | 2732          | 4896          | 13835         | 0             | 0             | 4638          |
| 28    | 20564         | 3845         | 2256          | 107543        | 2187          | 6453          | 2015          | 0             | 0             | 3240          |
| 29    | 12877         | 2938         | 1250          | 64926         | 9522          | 5889          | 113158        | 1268          | 0             | 1177          |
| 30    | 3312          | 1157         | 374           | 201988        | 5701          | 2015          | 19038         | 633           | 0             | 2510          |
| 31    | 2148          | 2770         | 671           | 148681        | 3242          | 3564          | 10284         | 594           | 0             | 2303          |
| 32    | 4809          | 1480         | 267           | 184357        | 1311          | 2343          | 1727          | 5004          | 0             | 3572          |
| 33    | 0             | 1283         | 1179          | 52679         | 5892          | 4770          | 5793          | 1851          | 49136         | 2644          |
| 34    | 0             | 1882         | 363428        | 24095         | 6068          | 3188          | 19335         | 0             | 14901         | 696           |
| 35    | 0             | 1764         | 76            | 1140          | 34811         | 6771          | 20602         | 0             | 14506         | 10            |
| 36    | 0             | 981          | 86            | 46831         | 19531         | 9029          | 11358         | 0             | 0             | 2797          |
| 37    | 5840          | 248          | 141           | 131833        | 6368          | 3233          | 2636          | 0             | 0             | 2982          |
| 38    | 7763          | 471          | 102           | 218273        | 2366          | 2089          | 1710          | 819           | 0             | 5155          |
| 39    | 1370          | 1168         | 457           | 131592        | 7221          | 3923          | 13278         | 0             | 0             | 4467          |
| 40    | 1658          | 604          | 258           | 140260        | 4469          | 4733          | 9639          | 0             | 0             | 4946          |
| 41    | 7875          | 921          | 203           | 135906        | 3606          | 5606          | 17628         | 0             | 0             | 5744          |
| 42    | 4791          | 188          | 188           | 202151        | 1666          | 2710          | 8494          | 0             | 0             | 5409          |
| 43    | 0             | 1487         | 325973        | 104761        | 8629          | 1535          | 2999          | 0             | 0             | 1171          |
| 44    | 23967         | 4414         | 4173          | 11579         | 16172         | 7874          | 4820          | 0             | 0             | 613           |
| 45    | 0             | 733          | 1156          | 244102        | 2576          | 1681          | 1607          | 0             | 0             | 4168          |
| 46    | 22639         | 5981         | 3213          | 9541          | 19564         | 8795          | 4926          | 0             | 0             | 612           |
| 47    | 1445          | 1694         | 7965          | 9507          | 28732         | 7581          | 21663         | 0             | 0             | 193           |
| 48    | 1573          | 403          | 53272         | 60399         | 4635          | 16190         | 15093         | 0             | 0             | 1805          |
| 49    | 1545          | 800          | 58447         | 57306         | 15150         | 6070          | 15853         | 0             | 0             | 1897          |
| 50    | 0             | 254          | 280640        | 145783        | 4076          | 382           | 1785          | 0             | 0             | 2439          |

**Table S2.** Counts of the main fluorescence characteristic line detected in the measurement points of *Saint Jerome in the studio*.

| Point | Hg L $\alpha$ | K K $\alpha$ | Cu K $\alpha$ | Pb L $\alpha$ | Fe K $\alpha$ | Sn K $\alpha$ | Pb M $\alpha$ | Ca K $\alpha$ | Sr K $\alpha$ |
|-------|---------------|--------------|---------------|---------------|---------------|---------------|---------------|---------------|---------------|
| 1*    | 63877         | 1352         | 2235          | 109991        | 3400          | 1679          | 2154          | 2807          | 3549          |
| 2*    | 25192         | 5457         | 3531          | 197608        | 11277         | 9065          | 1453          | 12087         | 733           |
| 3*    | 70601         | 10164        | 5848          | 87494         | 19377         | 1951          | 1252          | 6516          | 3066          |
| 4*    | 66471         | 4674         | 1725          | 126892        | 7103          | 3032          | 2245          | 6065          | 2695          |
| 5*    | 0             | 1179         | 316           | 265884        | 9157          | 4615          | 4053          | 3741          | 960           |
| 6*    | 10749         | 367          | 111           | 266638        | 8024          | 445           | 5996          | 1558          | 1024          |
| 7*    | 1673          | 1738         | 65            | 219952        | 51371         | 0             | 3927          | 6314          | 1436          |
| 8*    | 9568          | 2142         | 269           | 228196        | 21963         | 0             | 4152          | 3055          | 1939          |
| 9*    | 3915          | 2494         | 311           | 174622        | 69459         | 1895          | 2638          | 8190          | 2769          |
| 10*   | 1128          | 886          | 181           | 259241        | 7182          | 0             | 5170          | 1967          | 1001          |
| 11*   | 22709         | 842          | 99            | 249885        | 2706          | 1941          | 6486          | 1720          | 1194          |
| 12*   | 37906         | 1461         | 228           | 188628        | 18603         | 1609          | 4080          | 2422          | 1774          |
| 13*   | 0             | 2130         | 1462          | 209778        | 7365          | 3668          | 1512          | 4004          | 1342          |
| 14*   | 0             | 2013         | 2084          | 187204        | 13956         | 2837          | 2556          | 2473          | 2398          |
| 15*   | 7792          | 4115         | 575           | 151480        | 25801         | 3623          | 3897          | 2231          | 3760          |
| 16*   | 2330          | 3088         | 398           | 248634        | 23194         | 1804          | 6688          | 5574          | 2061          |
| 17*   | 17083         | 3038         | 640           | 232897        | 24381         | 544           | 5010          | 7071          | 2262          |
| 18*   | 3131          | 3382         | 706           | 163578        | 51542         | 0             | 3077          | 5534          | 4836          |
| 19*   | 0             | 551          | 423           | 236815        | 14070         | 3789          | 7239          | 1382          | 1045          |
| 20*   | 458           | 3308         | 4336          | 168104        | 53660         | 3517          | 3155          | 6492          | 3544          |
| 21*   | 0             | 3178         | 481446        | 67795         | 10301         | 529           | 1002          | 5007          | 576           |
| 22*   | 0             | 571          | 509           | 263956        | 3353          | 1073          | 6603          | 1852          | 503           |
| 23*   | 0             | 0            | 318           | 11359         | 3417          | 0             | 3737          | 70521         | 28412         |
